# Supplementary material
Source: PubMed Central journal article supplement (PMC6198934)
Supplement: NIHMS78304-supplement-Supplementary_Information.pdf [file NIHMS78304-supplement-Supplementary_Information.pdf]

**Anthropogenic and environmental factors associated with high prevalence of *mcr-1* carriage in humans across China**

Yingbo Shen<sup>1†</sup>, Hongwei Zhou<sup>2†</sup>, Jiao Xu<sup>3</sup>, Yongqiang Wang<sup>1</sup>, Qijing Zhang<sup>4</sup>,  
Timothy R. Walsh<sup>5</sup>, Bing Shao<sup>1</sup>, Congming Wu<sup>1</sup>, Yanyan Hu<sup>2</sup>, Lu Yang<sup>1</sup>, Zhangqi  
Shen<sup>1</sup>, Zuowei Wu<sup>4</sup>, Qiaoling Sun<sup>2</sup>, Yanran Ou<sup>1</sup>, Yueling Wang<sup>6</sup>, Shaolin Wang<sup>1</sup>,  
Yongning Wu<sup>7</sup>, Chang Cai<sup>8</sup>, Juan Li<sup>9</sup>, Jianzhong Shen<sup>1,10\*</sup>, Rong Zhang<sup>2\*</sup>, Yang  
Wang<sup>1,10\*</sup>

<sup>1</sup>Beijing Advanced Innovation Center for Food Nutrition and Human Health, College of Veterinary Medicine, China Agricultural University, Beijing 100193, China

<sup>2</sup>The Second Affiliated Hospital of Zhejiang University, Zhejiang University, Hangzhou 310009, China

<sup>3</sup>Institute for Nutrition and Health, Chinese Center for Disease Control and Prevention, Beijing 100050, China

<sup>4</sup>College of Veterinary Medicine, Iowa State University, Ames, Iowa 50011-1134, USA

<sup>5</sup>Department of Medical Microbiology and Infectious Disease, Institute of Infection & Immunity, UHW Main Building, Heath Park Hospital, Cardiff CF14 4XN, UK

<sup>6</sup>Department of Clinical Laboratory, Shandong Provincial Hospital Affiliated to Shandong University, Jinan 250021, China

<sup>7</sup>The Key Laboratory of Food Safety Risk Assessment, Ministry of Health and China National Center for Food Safety Risk Assessment, Beijing 100021, China

<sup>8</sup>Australia-China Joint Laboratory for Animal Health Big Data Analytics, School of Veterinary and Life Sciences, Murdoch University, Murdoch 6150, Australia

<sup>9</sup>State Key Laboratory of Infectious Disease Prevention and Control, Collaborative Innovation Center for Diagnosis and Treatment of Infectious Disease, National Institute for Communicable Disease Control and Prevention, Chinese Center for Disease Control and Prevention, Beijing 102206, China

<sup>10</sup>Beijing Key Laboratory of Detection Technology for Animal-Derived Food Safety, College of Veterinary Medicine, China Agricultural University, Beijing 100194, China

**†These authors contributed equally to this work.**

**\*Correspondence to:**

**Yang Wang**, Beijing Advanced Innovation Center for Food Nutrition and Human Health, College of Veterinary Medicine, China Agricultural University, Beijing 100194, China, [wangyang@cau.edu.cn](mailto:wangyang@cau.edu.cn)

**Rong Zhang**, The Second Affiliated Hospital of Zhejiang University, Zhejiang University, Hangzhou 310009, China, [zhang-rong@zju.edu.cn](mailto:zhang-rong@zju.edu.cn)

**Jianzhong Shen**, Beijing Key Laboratory of Detection Technology for Animal-Derived Food Safety, China Agricultural University, Beijing 100194, China, [sjz@cau.edu.cn](mailto:sjz@cau.edu.cn)

Supplementary Figure 1

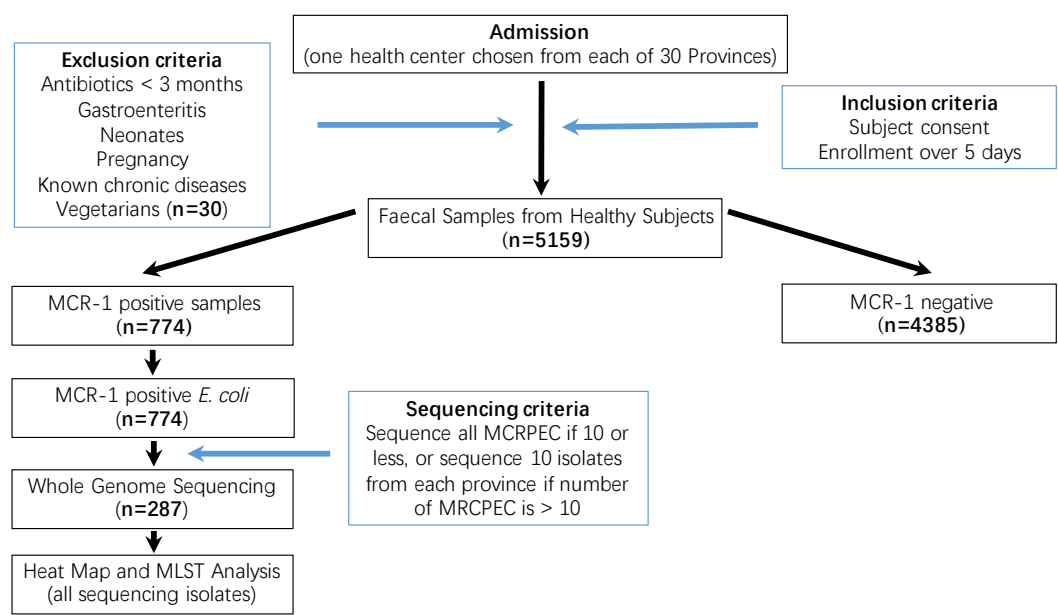

Supplementary Figure 1. Diagram of study design.

Supplementary Figure 2

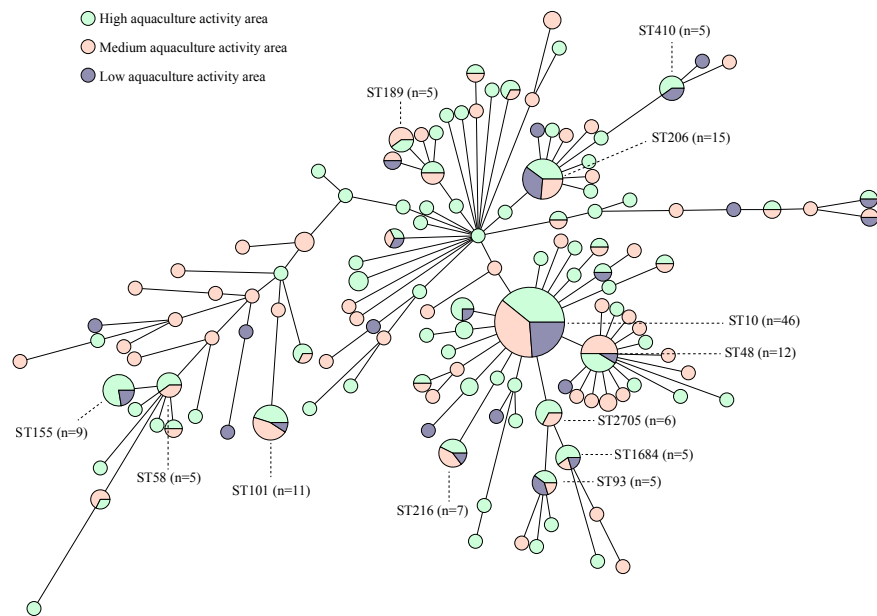

Supplementary Figure 2. Minimum spanning trees of all sequenced MCRPEC by MLST type and gene allele profile. Each node within the tree represents a single ST. The size of the nodes is proportional to the number of isolates represented by said node. Selected nodes are labelled with corresponding ST and number of isolates (at least five).

Supplementary Figure 3

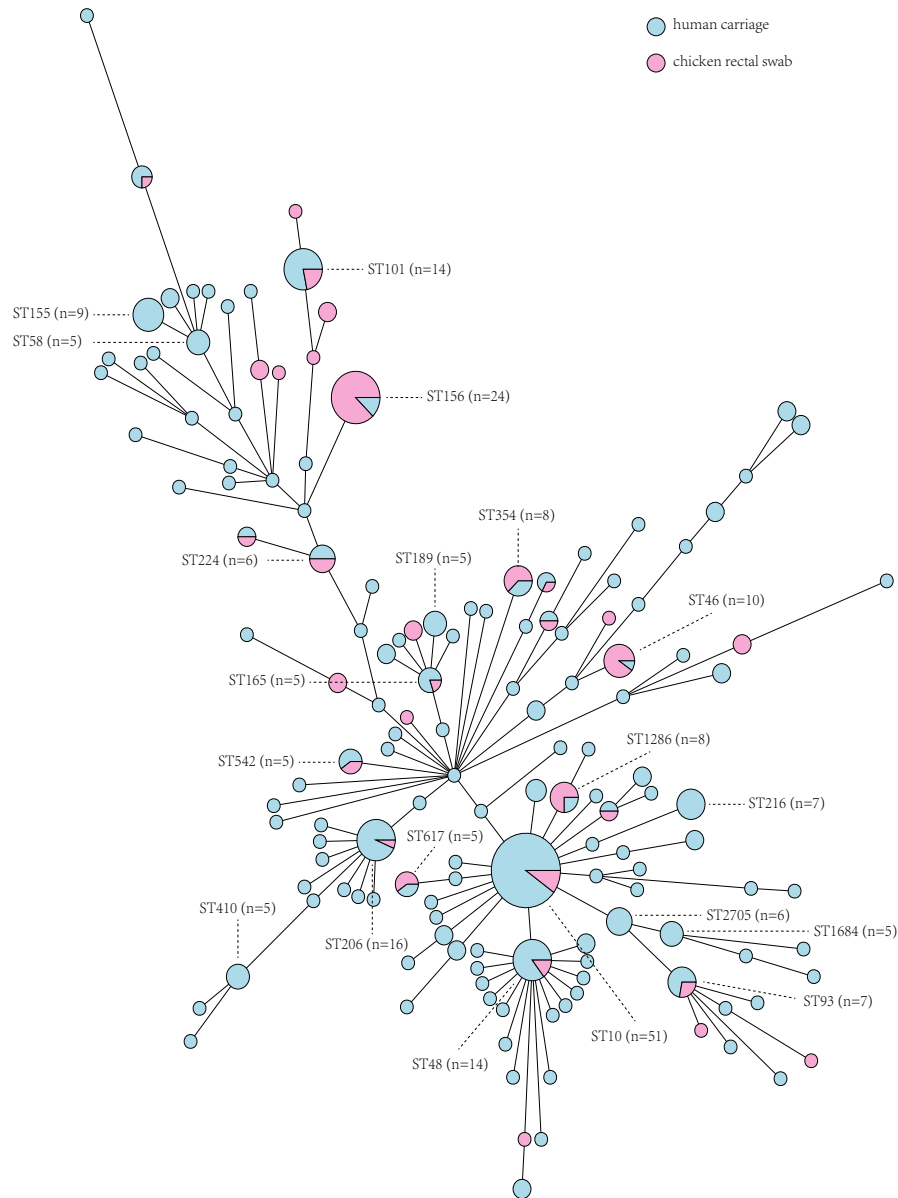

**Supplementary Figure 3.** Minimum spanning trees of MCRPEC by MLST type and gene allele profile for the human isolates of this study and chicken isolates from China of other studies. Each node within the tree represents a single ST. The size of the nodes is proportional to the number of isolates represented by said node. Selected nodes are labelled with corresponding ST and number of isolates (at least five).

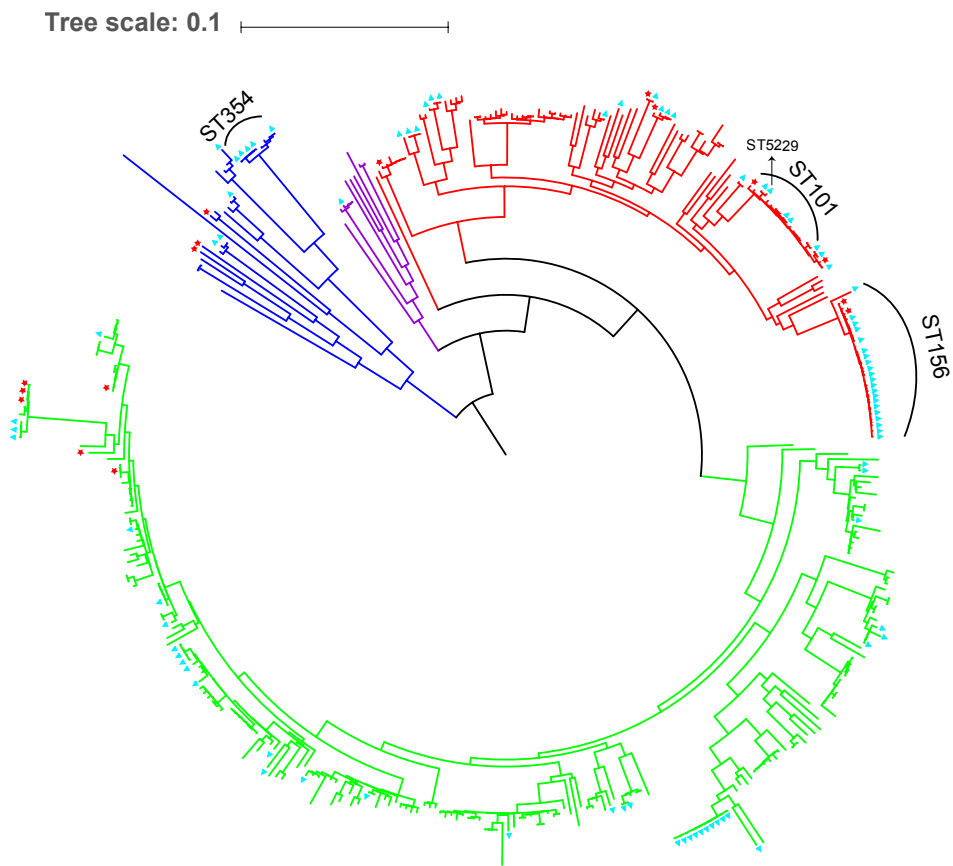

**Supplementary Figure 4.** Phylogenetic tree of all *mcr-1*-carring *E. coli* from humans in this study and chicken MCRPEC from other studies. Each branch of isolates are denoted by four colours corresponding to four lineages. Red star and blue triangle represent the sixteen and eighty-eight isolates from other countries and chicken origin from China, respectively.

Supplementary Figure 5

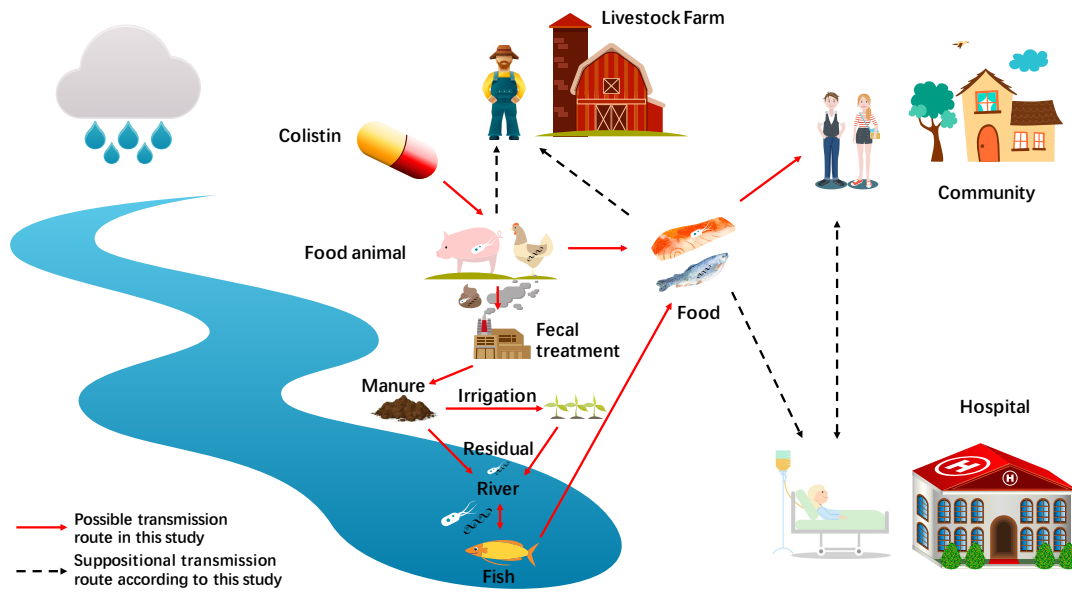

**Supplementary Figure 5.** Diagram showing the possible transmission route of *mcr-1*/*mcr-1*-carrying isolates among animal, environment and humans.

**Supplementary Table 4. Comparison of the MIC profiles of nine tested antimicrobials among the MCRPEC isolates of the different aquaculture conditional areas.**

| Antimicrobials              | Number of Resistance (resistance rate %) in different aquaculture conditions area |                         |                       | P value ( $\chi^2$ )      |
|-----------------------------|-----------------------------------------------------------------------------------|-------------------------|-----------------------|---------------------------|
|                             | Low activity (n=71)                                                               | Medium activity (n=236) | High activity (n=467) |                           |
| Cefepime                    | 14 (19.72%)                                                                       | 58 (24.58%)             | 68 (14.29%)           | <b>0.002<sup>**</sup></b> |
| Amikacin                    | 0 (0%)                                                                            | 4 (1.69%)               | 5 (1.07%)             | -                         |
| Piperacillin/Tazobactam     | 6 (8.45%)                                                                         | 9 (3.81%)               | 23 (4.93%)            | 0.309                     |
| Ceftazidime                 | 12 (16.90%)                                                                       | 44 (18.64%)             | 51 (10.92%)           | <b>0.018<sup>*</sup></b>  |
| Ticarcillin/Clavulanic acid | 39 (54.93%)                                                                       | 147 (62.29%)            | 262 (56.10%)          | 0.705                     |
| Ciprofloxacin               | 33 (46.48%)                                                                       | 106 (44.92%)            | 162 (34.69%)          | <b>0.011<sup>*</sup></b>  |
| Imipenem                    | 1 (1.41%)                                                                         | 3 (1.27%)               | 6 (1.28%)             | 0.995                     |
| Colistin                    | 43 (60.56%)                                                                       | 174 (73.73%)            | 333 (71.31%)          | 0.099                     |
| Cefoperazone/Sulbactam      | 4 (5.63%)                                                                         | 6 (2.54%)               | 8 (1.71%)             | 0.112                     |

\* $P<0.05$ , \*\* $P<0.01$

**Supplementary Table 5. Information of worldwide mcr-1-positive *E. coli* isolates of human origin downloaded from NCBI.**

| isolate      | Accession     | species       | collected time | country     | source                    | ST   |
|--------------|---------------|---------------|----------------|-------------|---------------------------|------|
| WI2          | SAMEA19195918 | <i>E.coli</i> | 2016           | France      | clinical                  | 1288 |
| MDR_56       | SAMN06344815  | <i>E.coli</i> | 2015.5         | USA         | clinical                  | 117  |
| 3431F        | SAMN06233851  | <i>E.coli</i> | 2014           | Brazil      | rectal swab               | 744  |
| 2016C-3936C1 | SAMN061595501 | <i>E.coli</i> | –              | USA         | clinical                  | 2734 |
| C153         | SAMN06051286  | <i>E.coli</i> | 2016           | Brazil      | blood                     | 410  |
| O177:H21     | SAMN05407982  | <i>E.coli</i> | 2015.4         | Netherlands | faeces                    | 359  |
| 204965       | SAMN06163642  | <i>E.coli</i> | 2016.6.20      | Austria     | stool clinical            | 10   |
| BJ10         | SAMN04884976  | <i>E.coli</i> | 2015.2.21      | China       | clinical liver<br>ascites | 156  |
| HC891        | SAMN06043562  | <i>E.coli</i> | 2016.4.11      | Brazil      | blood                     | 156  |
| MRSN346355   | MRSN346355    | <i>E.coli</i> | 2016.7         | USA         | clinical                  | 617  |
| MCR1_NJ      | SAMN05294116  | <i>E.coli</i> | 2014.8         | USA         | clinical                  | 405  |
| MRSN346595   | MRSN346595    | <i>E.coli</i> | 2016.7         | USA         | clinical                  | 617  |
| MRSN346638   | MRSN346638    | <i>E.coli</i> | 2016.7         | USA         | clinical                  | 617  |
| MRSN388634   | MRSN388634    | <i>E.coli</i> | 2016.7         | USA         | clinical                  | 101  |
| STEC_575     | SAMN04002628  | <i>E.coli</i> | 2013.9         | Netherlands | stool clinical            | 21   |
| TN1          | SAMN04423147  | <i>E.coli</i> | 2013.11        | Vietnam     | feces clinical            | 1589 |
